# Supplementary material for: Reinforcement and Maintenance of Human Resources for Health Systems during Long-Term Crises: A Systematic Review of Systematic Reviews
Source: Emerg Med Int. 2021 Oct 31;2021:9613443. doi: 10.1155/2021/9613443 (PMC8572622; doi:10.1155/2021/9613443)
Supplement: Supplementary Materials — Supplementary 1: the PRISMA checklist. The Preferred Reporting Items for Systematic Reviews and Meta-Analysis (PRISMA) is a 27-item checklist used to improve transparency in systematic reviews. These items cover all aspects of the manuscript, including title, abstract, introduction, methods, results, discussion, and funding. Supplementary 2: evaluating the quality of articles using AMSTAR checklist. The included articles were evaluated using a checklist entitled “Measurement Tool to Assess Systematic Reviews (AMSTAR)” [11] to assess methodological quality. The tool consists of 11 items and has good face and content validity for measuring the methodological quality of systematic reviews. [file 9613443.f1.zip]

Archive with 2 entries (2 files):
- 9613443.f1/Supplementary1.docx
- 9613443.f1/Supplementary2.docx
